# Supplementary material
Source: PubMed Central journal article supplement (PMC7272308)
Supplement: NIHMS1578072-supplement-1.pdf [file NIHMS1578072-supplement-1.pdf]

## Supplemental Figure S1

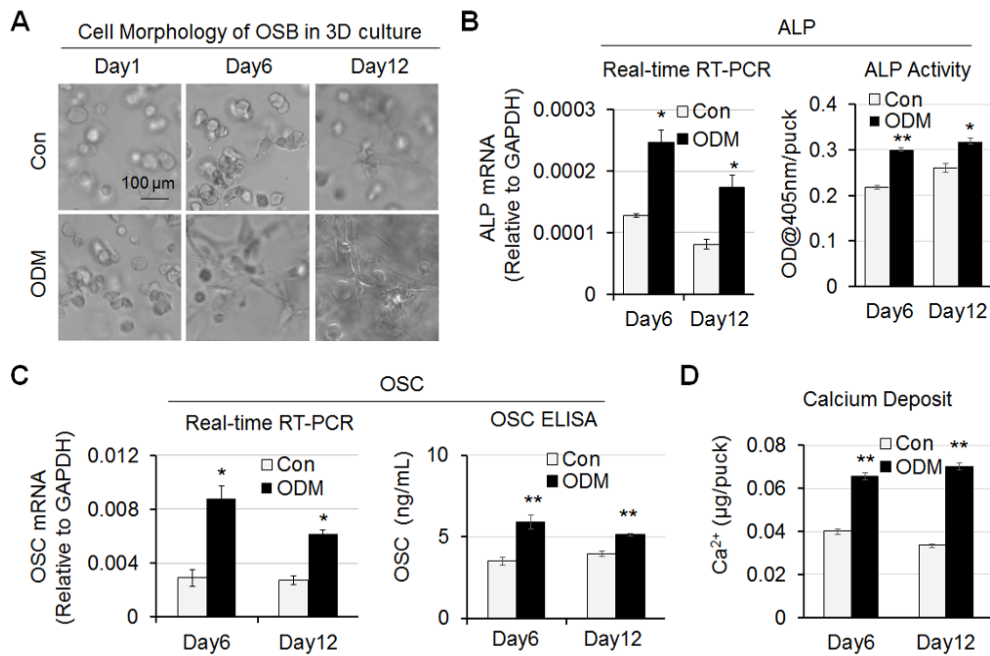

**Figure S1.** Differentiation of pre-osteoblast MC3T3-E1 cells in 3D hydrogel. **A)** Cell morphology of pre-osteoblast MC3T3-E1 cells (OSB) cultured in osteogenic differentiation medium (ODM) over 1, 6, and 12 days vs in regular medium (Con). **B)** ALP mRNA was determined by real-time RT-PCR and ALP protein levels were determined by measuring ALP activity. **C)** OSC mRNA was determined by real-time RT-PCR and OSC protein levels were measured using OSC ELISA kit. **D)** Calcium deposit was determined by calcium assay. \*:  $P < 0.05$ ; \*\*:  $P < 0.01$  as compared to its control (Con).
