# Supplementary material
Source: PubMed Central journal article supplement (PMC7272308)
Supplement: NIHMS1578072-supplement-2.pdf [file NIHMS1578072-supplement-2.pdf]

Figure S2

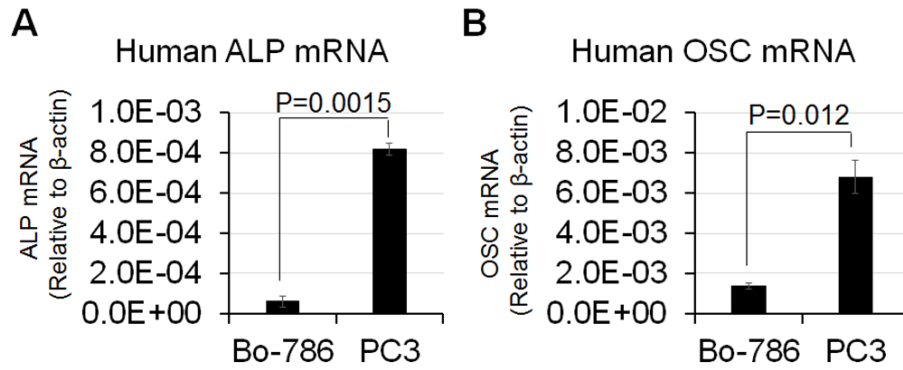

**Figure S2.** ALP and OSC gene expression in human Bo-786 RCC cells and PC3 prostate cancer cells. Real-time RT-PCR using human-specific primers for ALP mRNA (A) and OSC mRNA (B) from human Bo-786 RCC cells and PC3 prostate cancer cells.
